# Supplementary material for: Dual-functional additives for stable perovskite thin films
Source: Royal Society of Chemistry journal article supplement (doi:10.1039/d5su00499c), 2025-11-03
Supplement: d5su00499c1.pdf [file d5su00499c1.pdf]

Supporting information

### **Dual-functional Additive for Stable Perovskite Thin Film**

*Siwon Yun<sup>a†</sup>, Mi-Seon Bae<sup>b†</sup>, Muhammad Adnan<sup>a</sup>, Zobia Irshad<sup>a</sup>, Wonjong Lee<sup>a</sup>, Hyeji Han<sup>a</sup>, Tae-Youl Yang<sup>b\*</sup>, Hyo Sik Chang<sup>a\*</sup>, Jinseck Kim<sup>c\*</sup>, and Jongchul Lim<sup>a\*</sup>*

Siwon Yun, Muhammad Adnan, Zobia Irshad, Wonjong Lee, Hyeji Han, Hyo Sik Chang, and Jongchul Lim

Graduate School of Energy Science & Technology, Chungnam National University, Daejeon 34134, Republic of Korea.

Email: J.C. Lim ([jclim@cnu.ac.kr](mailto:jclim@cnu.ac.kr))

*Mi-Seon Bae, Tae-Youl Yang*

Department of Materials Science and Engineering, Chungnam National University, Daejeon 34134, Republic of Korea

Email: T.Y. Yang ([taeyyang@cnu.ac.kr](mailto:taeyyang@cnu.ac.kr))

*Jinseck Kim*

Department of Polymer-Nano Science and Technology, Department of Nano Convergence Engineering, Jeonbuk National University, Jeonju, 54896, Republic of Korea

Email: J.S. Kim ([jskim422@jbnu.ac.kr](mailto:jskim422@jbnu.ac.kr))

## Materials

The pre-patterned FTO glass-substrates (Pilkington, TEC8) were purchased from AMG-Tech. Poly[bis(4-phenyl)(2,4,6-trimethylphenyl)amine (PTAA), toluene(99.8), *N, N*-dimethylformamide (DMF, 99.8%), chlorobenzene (CB, 99.8%), phenyl-C<sub>61</sub>-butyric acid methyl ester (PCBM, 99%), ethyl acetate (EA, 99.8%) and dimethyl sulfoxide (DMSO, 99.8%) were purchased from Sigma-Aldrich. Lead (II) bromide (PbBr<sub>2</sub>) was bought from Lumtech. Cesium iodide (CsI, 99.0%) and Lead (II) iodide (PbI<sub>2</sub>, 99.99%) were purchased from TCI. Tin (IV) oxide, 15% in H<sub>2</sub>O colloidal dispersion, was purchased from Alfa Aesar. Formamidinium iodide (FAI, 99.99%) was purchased from Great Solar Cell.

## Film and Device Fabrication

All perovskite films and precursors are prepared in ambient air conditions. The perovskite solar cells were prepared in an n-i-p configuration. First, the glasses were cleaned using ultrasonication with detergent, water, ethyl alcohol, and acetone for 15 min. Then, they were dried with blown nitrogen and dry at 80 °C. To increase their hydrophilicity, a further 15-min UV-Ozone treatment was applied. For films, the perovskite solution was directly spin-coated onto the glass substrate. The perovskite precursor solution composition is Cs<sub>0.17</sub>FA<sub>0.83</sub>Pb(I<sub>0.77</sub>Br<sub>0.23</sub>)<sub>3</sub>. The precursor solution was prepared by dissolving CsI, PbI<sub>2</sub>, PbBr<sub>2</sub> and FAI in a DMF/DMSO mixture (vol/vol = 4/1). The solution was stirred and filtered (0.45 µm, PTFE) before spin-coating. As additives, BMIM-SCN or BMI-Pb(SCN)<sub>3</sub> was added to the perovskite precursor solution at a concentration of 0.03 µL/mL as additive. The perovskite solution was spin-coated at 500 rpm for 5 s, 1000 rpm for 10 s, and 5,000 rpm for 50 s in a three-step process. During the last coating step, 0.2 µL of EA was dropped on the spinning substrate 30 s before the end of the spin-coating, and then annealed at 100 °C for 1 h.

Perovskite solar cells (PSCs) were fabricated with a configuration of FTO / dense blocking TiO<sub>2</sub> layer (bl-TiO<sub>2</sub>) / mesoporous TiO<sub>2</sub> (mp-TiO<sub>2</sub>) / perovskite / PTAA / Au. Cleaned pre-patterned FTO glass substrates employed a bl-TiO<sub>2</sub> layer with spray coating of titanium diisopropoxide bis(acetylacetonate) dissolved in ethanol, and after the coating process, the substrates are annealed at 450 °C. mp-TiO<sub>2</sub> was formed by spin-coating TiO<sub>2</sub> paste nanoparticles dispersed in a mixed solvent (2-methoxy ethanol/terpineol = 3.5:1 w/w) at 2,500 rpm onto the FTO/bl-TiO<sub>2</sub> substrate and then heat-treated on a hot plate at 500 °C for 1 h. A PTAA solution for the hole transport material was prepared by dissolving 10 mg of PTAA in 1 ml of toluene with 3.75 µL of a Li-bis(trifluoromethanesulfonic)imide (Li-TFSI) solution (340 mg in 1 mL in acetonitrile), and 4-tert-butylpyridine (tBP) 3.75 µL in 1 mL of chlorobenzene. The solution was spin-coated at 3000 rpm for 30 s. Finally, an Au counter electrode (70 nm) was deposited by thermal evaporation in a vacuum at 10<sup>-5</sup> torr.

## Measurements and Characterization

### Scanning Electron Microscopy

The scanning electron microscopy (SEM) was taken using Merlin Compact, Carl Zeiss (Germany) microscopes (beam accelerator voltages: 5 keV for surface morphology views of the perovskite films.)

### *J-V* Measurement

The *J-V* measurement of the PSCs was performed by Ivium Stat MUM technologies under an Am 1.5 solar stimulator at an irradiation intensity of 100 mW cm<sup>-2</sup>. To elucidate the PSCs performance and stability, 40 samples were evaluated.

### SSPL and TRPL measurement

Spectroscopy used a time-correlated single-photon counting module (TCSPC FluoTime 300 by Picoquant, GmbH). The steady-state photoluminescence (SSPL) measured a 20 MHz frequency and  $0.0125 \mu\text{J}/\text{cm}^2/\text{pulse}$  energy density, and the time-resolved photoluminescence (TRPL) measured a 0.5 MHz frequency and  $0.011 \mu\text{J}/\text{cm}^2/\text{pulse}$ . The sample structure was Glass/perovskite.

#### PV-SCLC measurement

The  $J$ – $V$  traces of pulsed voltage space charge limited current (PV-SCLC) were measured using a computer-controlled 2450 Series Keithley source meter at room temperature and room humidity under a dark state. The device configuration was Glass/Au / $\text{SnO}_2$ /perovskite/PCBM /Au.

#### UV-Vis Analysis

The absorption of the perovskite films was measured by ultraviolet-visible absorption spectroscopy (UV–vis) spectrophotometer UV-red-PMT monochromator (MSH300PQ-0002, picoquant). The sample structure was Glass/perovskite.

#### TPC measurement

To estimate the transient photo-conductivity (TPC) analysis, we have used the following device architecture: glass/perovskite/Au. The Nd: YAG laser (SLII-10) excitation source was tuned to a wavelength of 532 nm and pumped at 10 Hz with 4 ns pulses.

#### PLQY measurement

The Photoluminescence Quantum Yield (PLQY) was measured using an integration sphere (Newport, 819C-IC-3.3). They were measured by QEPro (Ocean Insight, 350-950nm). For excitation, we employed a continuous 532nm laser (Lasercentury, GL405N3-200) source. We measured PLQY  $7.62 \mu\text{W}/\text{cm}^2\cdot\text{s}$  energy density.

### ***XPS Analysis***

A K-alpha+Thermo Scientific (USA) was used to measure X-ray photoelectron spectroscopy (XPS) spectra of different samples for elemental analyses.

### ***XRD Analysis***

The X-ray diffraction (XRD) measurements were carried out to check the surface crystallinity of perovskite film with and without additives using a MiniFlex II Rigaku (Japan)  $\theta$ -2 $\theta$  goniometer with Cu K $\alpha$  ( $\lambda = 1.54051 \text{ \AA}$ ) radiation.

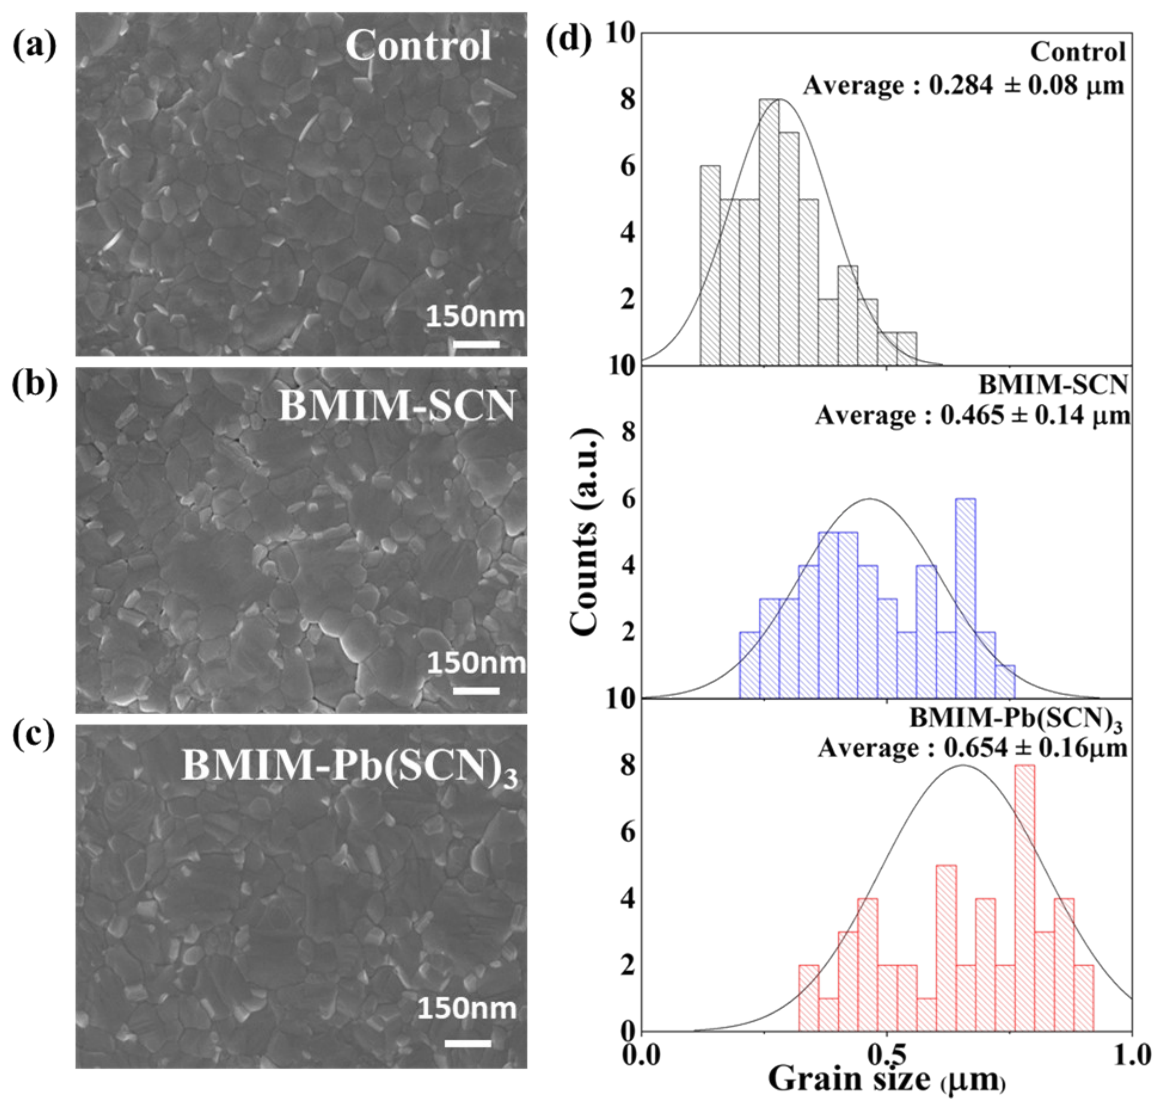

**Fig. S1.** SEM images of as prepared perovskite films (a) without additives, with (b) BMIM-SCN, and (c) BMIM-Pb(SCN)<sub>3</sub>. (d) Histograms of calculated grain size corresponding to the films.

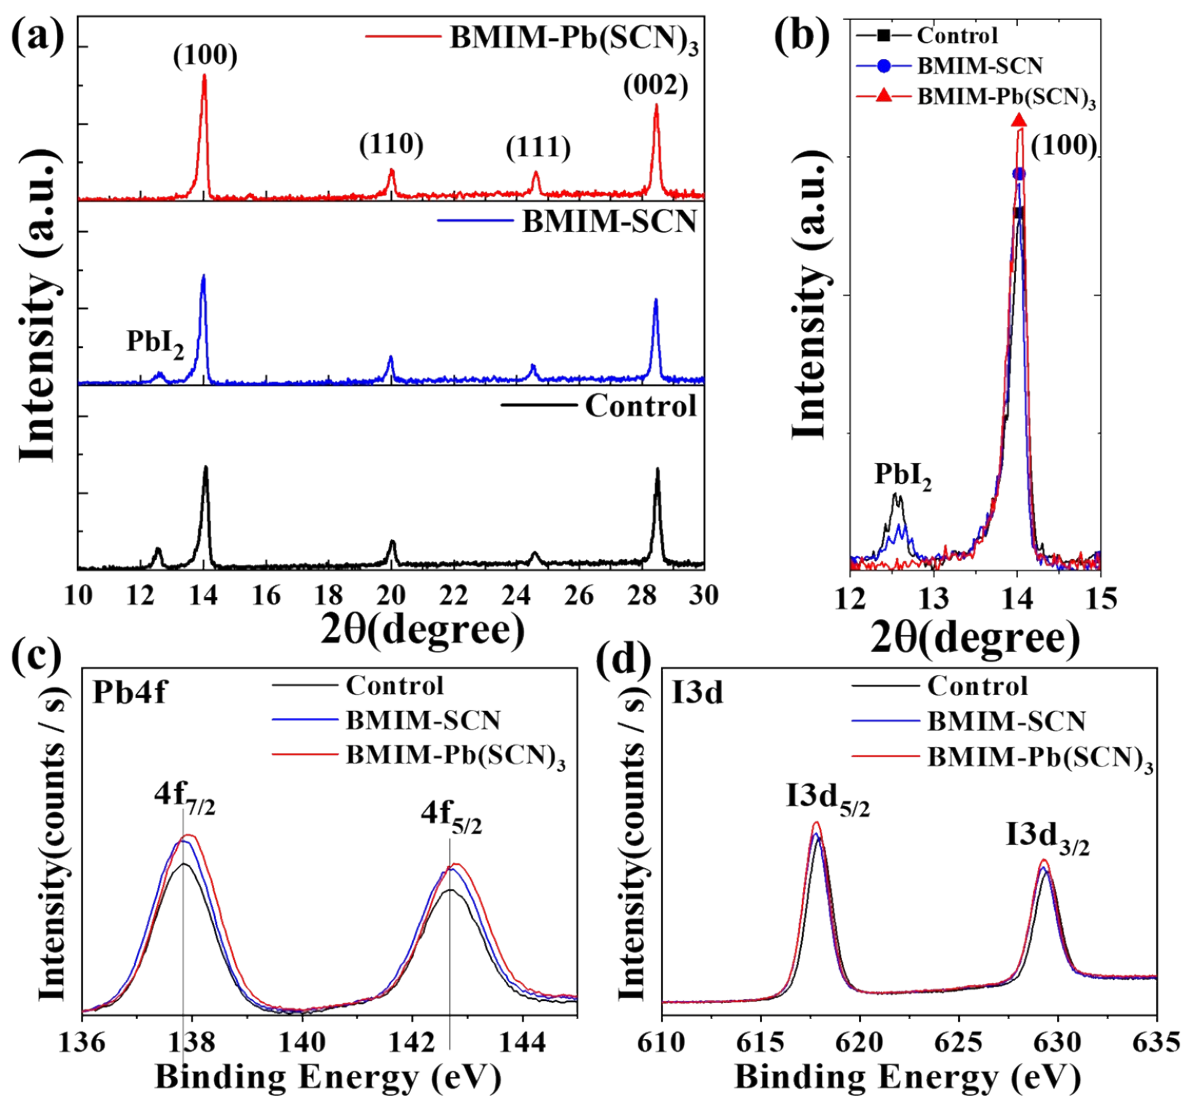

Fig. S2. (a) XRD results of as prepared perovskite films without and with additives (b) expansion view around (100) and PbI<sub>2</sub> peak. (c) XPS spectra of the as-prepared perovskite film for Pb 4f, and (d) I 3d

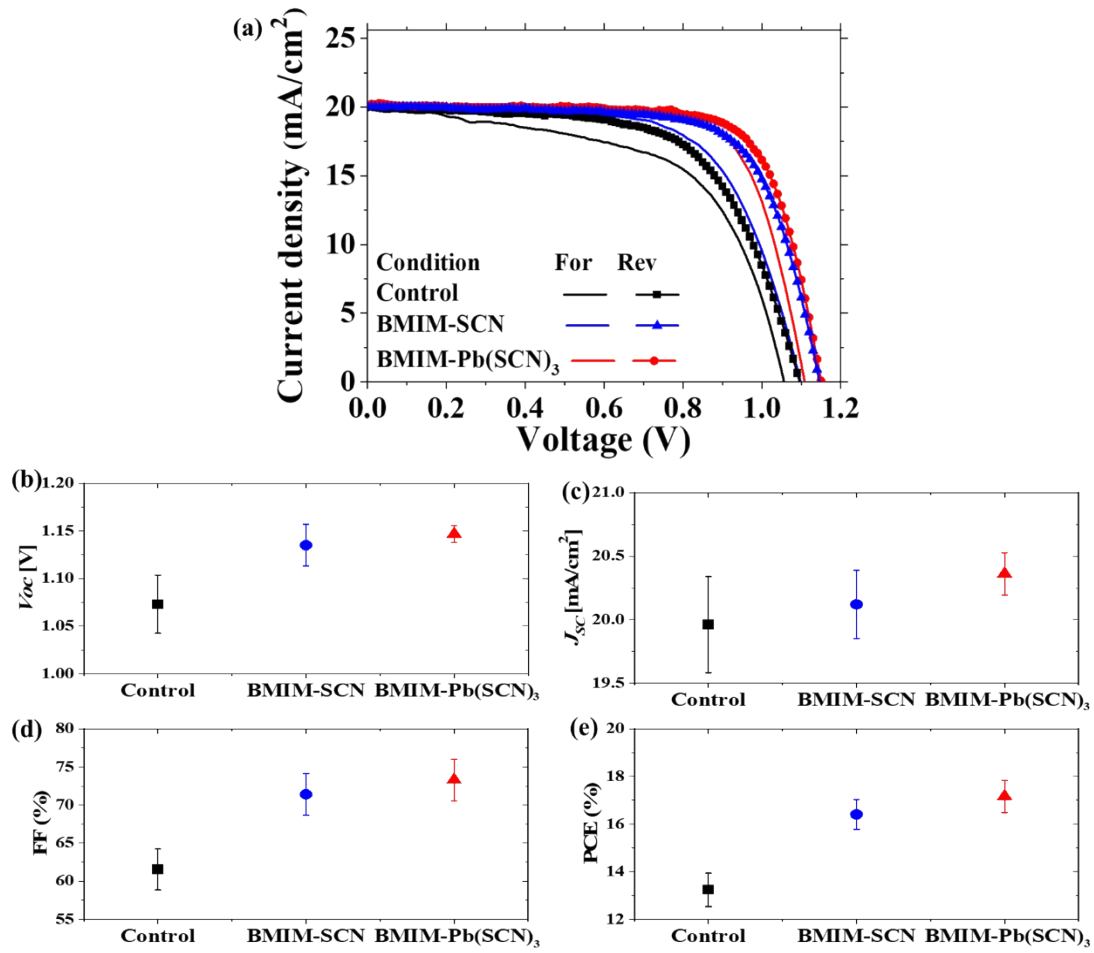

**Fig. S3. Summary of power conversion efficiency (PCE) of perovskite solar cells (PSCs) without and with additives. (a) Current density–voltage ( $J$ – $V$ ) trace for reverse (line with diamond) and forward (solid line) bias sweep. Distribution plot of characteristics of PSCs without and with additives, (b) open-circuit voltage ( $V_{oc}$ ), (c) short-circuit current density ( $J_{sc}$ ), (d) fill factor(FF), and (e) PCE.**



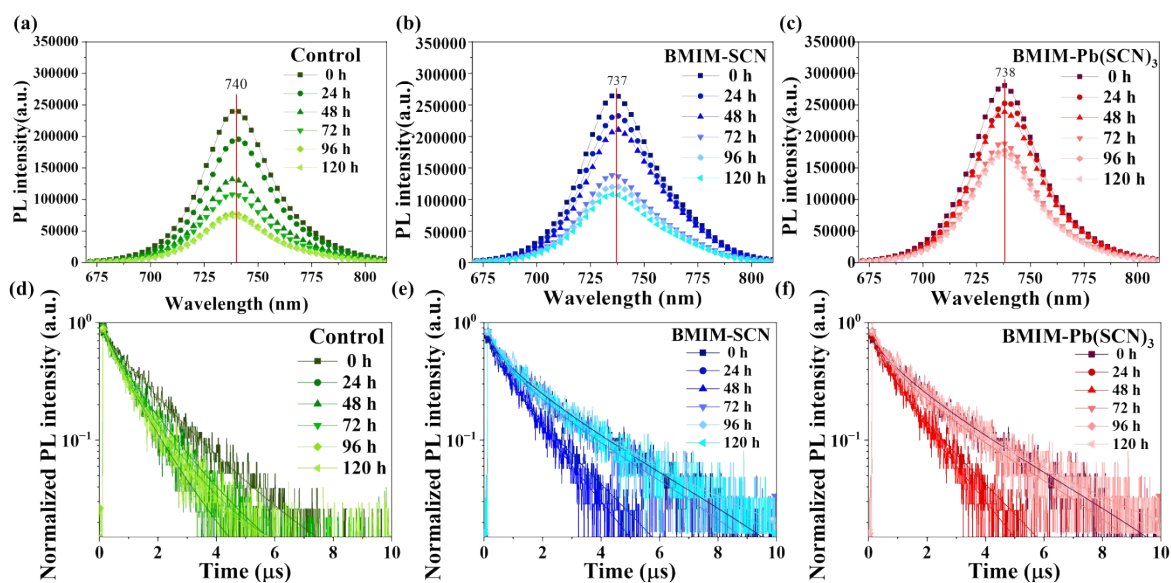

**Fig. S4. Steady-state photoluminescence (SSPL) results of perovskite film over the time; (a) without additive, (b) with BMIM-SCN, (c) BMIM-PB(SCN)<sub>3</sub>. Corresponding time-resolved photoluminescence (TRPL) results for the analogous samples; (d) without additive, (e) with BMIM-SCN, (f) BMIM-PB(SCN)<sub>3</sub>, respectively.**

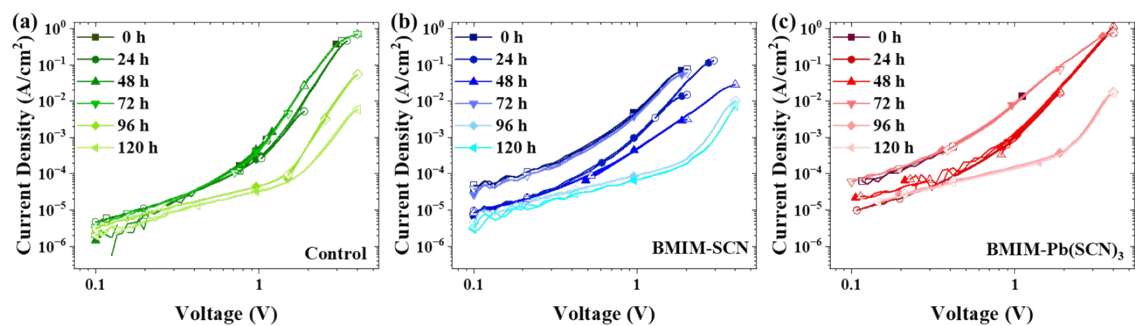

**Fig. S5.** The result of PV-SCLC from as prepared to 120 h. The result of (a) control sample, (b) BMIM-SCN, (c) BMIM-Pb(SCN)<sub>3</sub>.

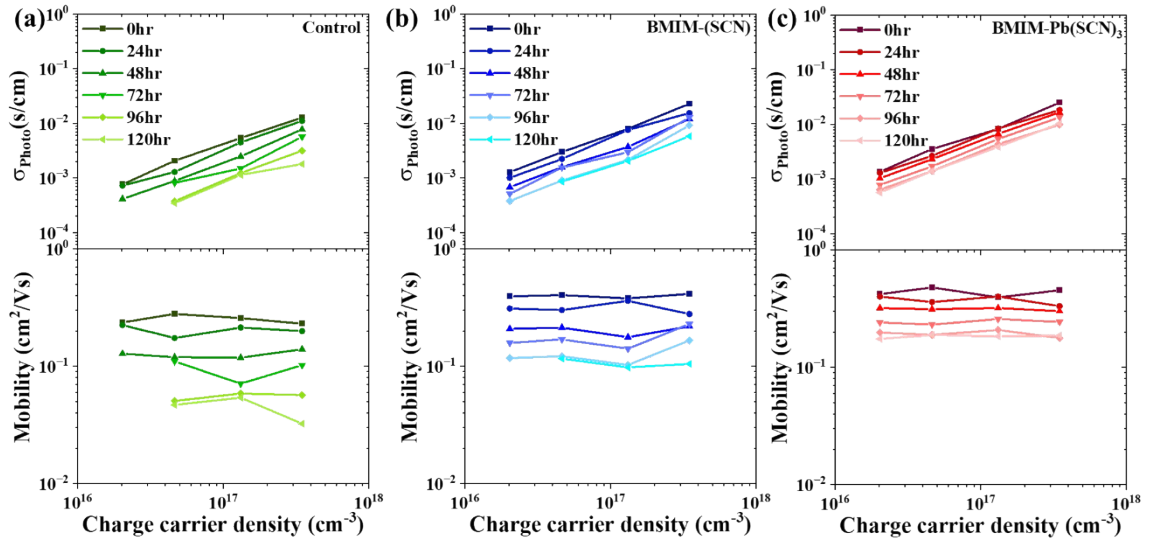

**Fig. S6.** The result of calculated photo-conductivity and mobility measured by the TPC method from as prepared to the 120 h, (a) the result of control sample, (b) BMIM-SCN, (c) BMIM-Pb(SCN)<sub>3</sub>.

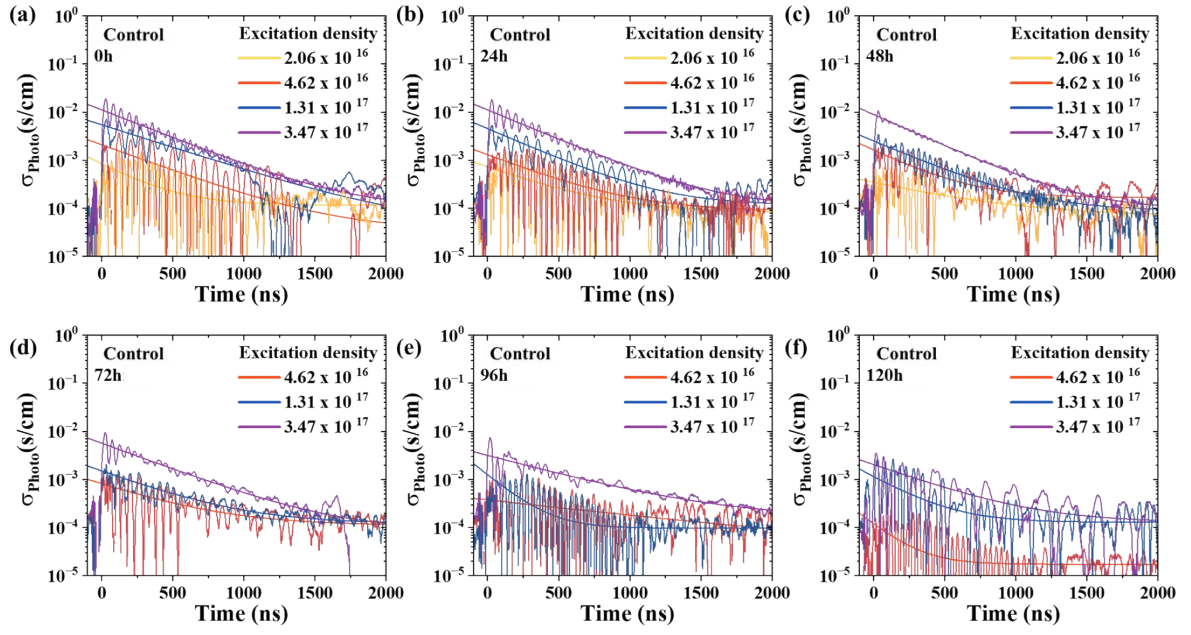

**Fig. S7.** The TPC result of control sample varying photon flux with (a) as prepared, (b) 24 h, (c) 48 h, (d) 72 h, (e) 96 h, (f) 120 h storage time in ambient air condition.

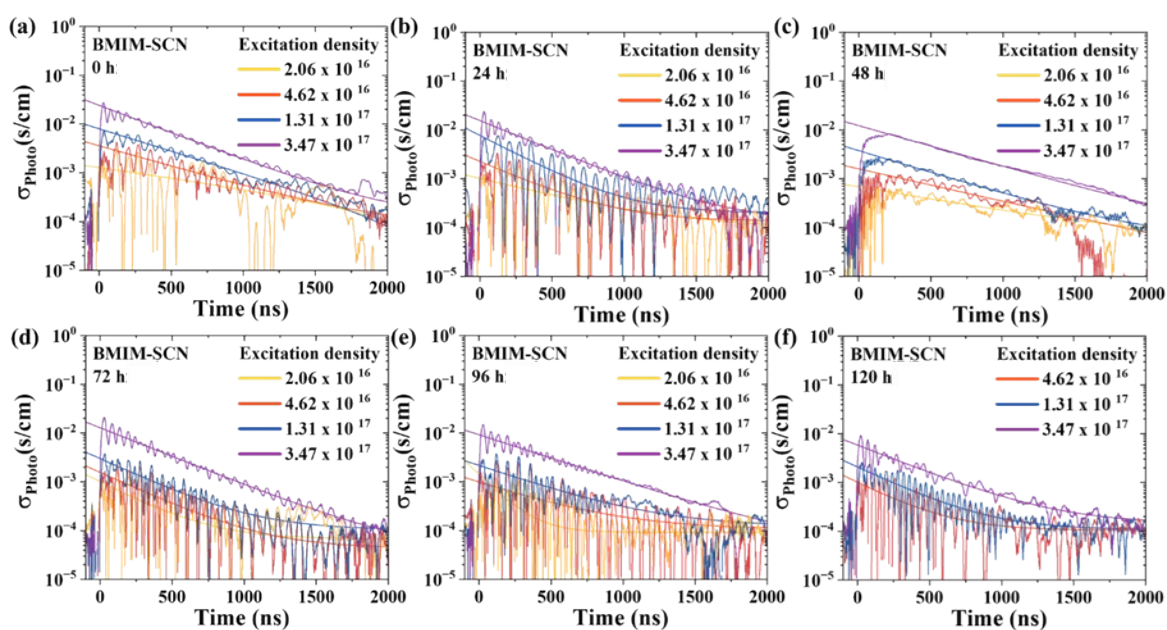

**Fig. S8.** The TPC result of BMIM-SCN sample varying photon flux with (a) as prepared, (b) 24 h, (c) 48 h, (d) 72 h, (e) 96 h, (f) 120 h storage time in ambient air condition.



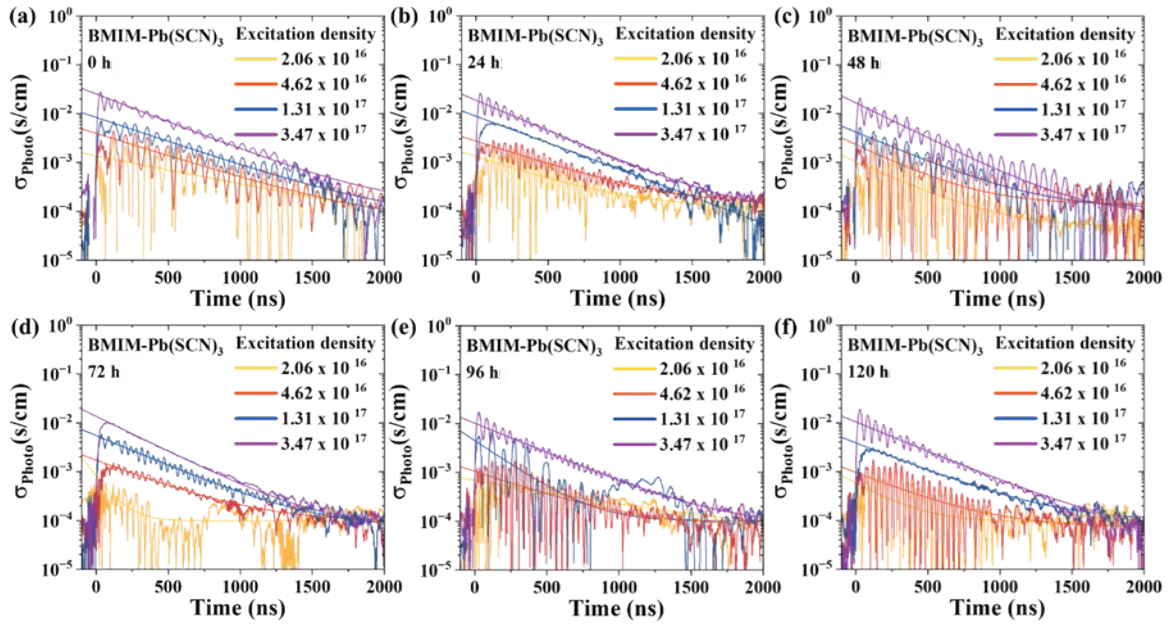

**Fig. S9.** The TPC result of BMIM-Pb(SCN)<sub>3</sub> sample varying photon flux with (a) as prepared, (b) 24 h, (c) 48 h, (d) 72 h, (e) 96 h, (f) 120 h storage time in ambient air condition.

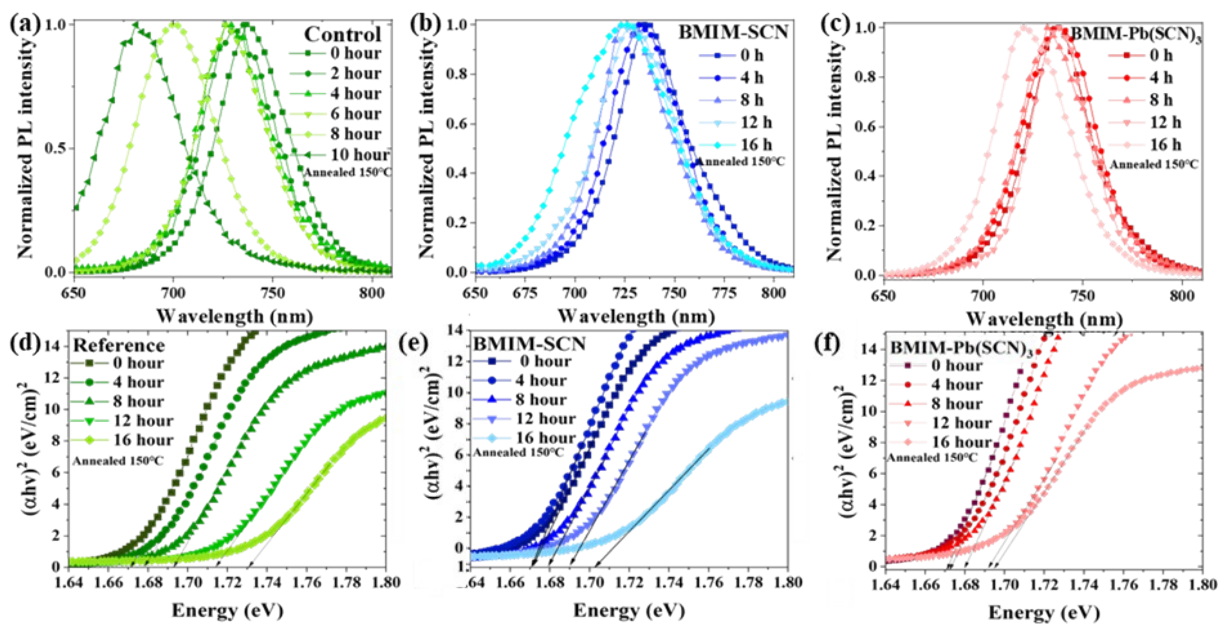

**Fig. S10.** Optical properties of perovskite films after thermal treatment (annealing at 150 °C for 16 h in ambient air). (a–c) Normalized PL spectra and (d–f) optical bandgaps of perovskite films; (a, d) without additive, (b, e) with BMIM-SCN, and (c, f) with BMIM-Pb(SCN)<sub>3</sub> additives.



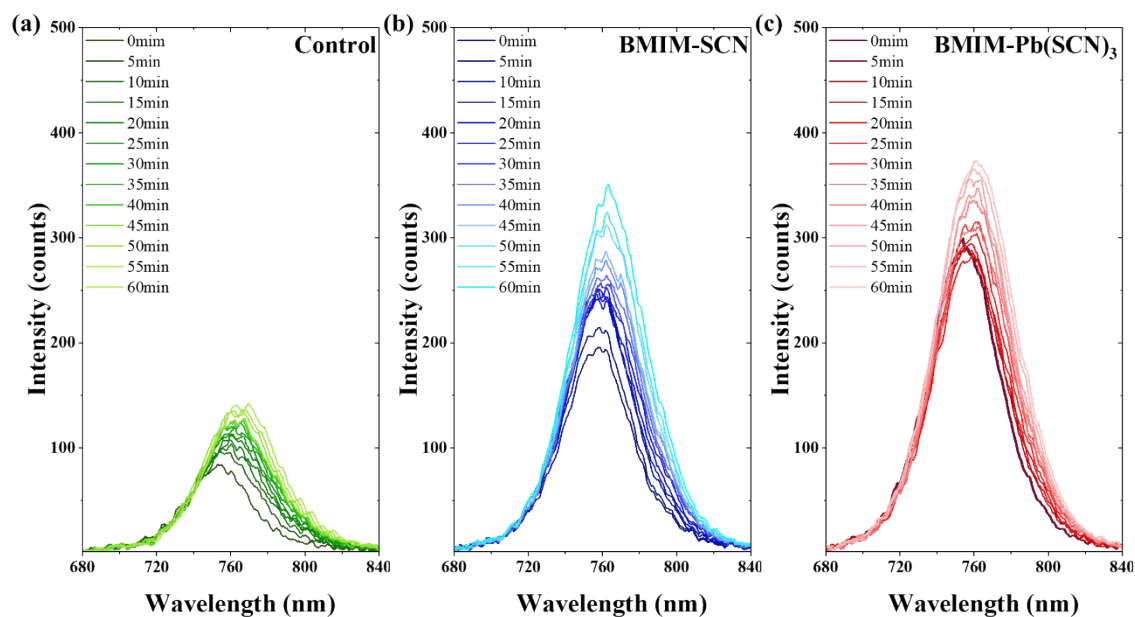

**Fig. S11. Optical properties change under the light illumination over the time (interval 5min for 1 h). (a) without additive, (b) with BMIM-SCN, and (c) with BMIM-Pb(SCN)<sub>3</sub> additives.**

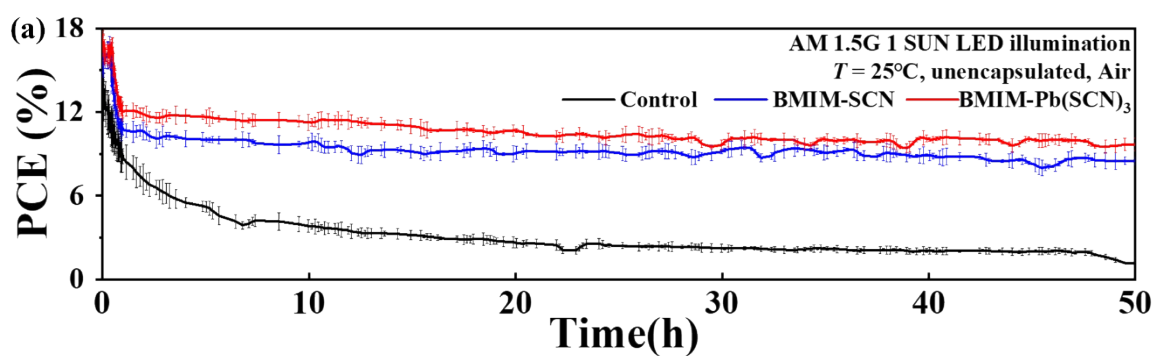

**Fig S12. PCE of PSCs without and with additives obtained from MPP measurement of unencapsulated PSCs under RT, 20 samples were evaluated**

|                                | Forward     |             |                           | Reverse     |             |                           |
|--------------------------------|-------------|-------------|---------------------------|-------------|-------------|---------------------------|
| Condition                      | Control     | BMIM-SCN    | BMIM-Pb(SCN) <sub>3</sub> | Control     | BMIM-SCN    | BMIM-Pb(SCN) <sub>3</sub> |
| $V_{oc}$ [V]                   | 1.01 ±0.08  | 1.06 ±0.07  | 1.13 ±0.06                | 1.11 ±0.07  | 1.15 ±0.06  | 1.16 ±0.05                |
| $J_{sc}$ [mA/cm <sup>2</sup> ] | 20.00 ±0.38 | 20.38 ±0.27 | 20.42 ±0.18               | 20.01 ±0.42 | 20.18 ±0.35 | 20.21 ±0.25               |
| FF [%]                         | 58.7 ±4.74  | 65.3 ±3.76  | 69.8 ±2.71                | 63.2 ±4.32  | 75 ±2.76    | 75.3 ±2.63                |
| PCE [%]                        | 11.86 ±0.70 | 14.1 ±0.62  | 16.11 ±0.57               | 14.04 ±0.72 | 17.4 ±0.63  | 17.65 ±0.64               |

**Table S1.** The summarized average PSCs efficiency in Fig. S2.

**Table S2. The summarized charge carrier lifetime average by the stretched fitting mode of the perovskite film with various additives from as-prepared to 120 h**

|          | $\tau$ (ns)        |                    |                           | $\beta$         |                 |                           |
|----------|--------------------|--------------------|---------------------------|-----------------|-----------------|---------------------------|
| Time (h) | Control            | BMIM-SCN           | BMIM-Pb(SCN) <sub>3</sub> | Control         | BMIM-SCN        | BMIM-Pb(SCN) <sub>3</sub> |
| 0        | 306.35 $\pm$ 26.11 | 321.33 $\pm$ 13.52 | 376.98 $\pm$ 16.95        | 0.75 $\pm$ 0.05 | 0.88 $\pm$ 0.05 | 0.66 $\pm$ 0.04           |
| 24       | 233.92 $\pm$ 14.83 | 279.97 $\pm$ 16.46 | 351.62 $\pm$ 17.31        | 0.72 $\pm$ 0.06 | 0.84 $\pm$ 0.07 | 0.68 $\pm$ 0.02           |
| 48       | 186.90 $\pm$ 23.92 | 248.39 $\pm$ 19.17 | 292.40 $\pm$ 18.23        | 0.86 $\pm$ 0.03 | 0.84 $\pm$ 0.03 | 0.59 $\pm$ 0.05           |
| 72       | 216.22 $\pm$ 13.49 | 314.63 $\pm$ 17.21 | 341.26 $\pm$ 12.79        | 0.72 $\pm$ 0.03 | 0.84 $\pm$ 0.02 | 0.68 $\pm$ 0.03           |
| 96       | 179.42 $\pm$ 17.49 | 203.77 $\pm$ 11.98 | 262.44 $\pm$ 18.85        | 0.74 $\pm$ 0.04 | 0.83 $\pm$ 0.04 | 0.61 $\pm$ 0.04           |
| 120      | 127.13 $\pm$ 15.22 | 159.98 $\pm$ 16.68 | 231.62 $\pm$ 24.47        | 0.69 $\pm$ 0.02 | 0.66 $\pm$ 0.04 | 0.59 $\pm$ 0.04           |

**Table S3. The summarized electric properties from PV-SCLC measurement of the perovskite film with various additives from as-prepared to 120 h.**

| Time<br>(h) | Conductivity<br>(S/cm)                            |                                                  |                                                  | Mobility<br>(cm <sup>2</sup> /V·S)              |                                                 |                                                 | Trap density<br>(cm <sup>-3</sup> )             |                                                 |                                                  |
|-------------|---------------------------------------------------|--------------------------------------------------|--------------------------------------------------|-------------------------------------------------|-------------------------------------------------|-------------------------------------------------|-------------------------------------------------|-------------------------------------------------|--------------------------------------------------|
|             | Control                                           | BMIM-SCN                                         | BMIM-Pb(SCN) <sub>3</sub>                        | Control                                         | BMIM-SCN                                        | BMIM-Pb(SCN) <sub>3</sub>                       | Control                                         | BMIM-SCN                                        | BMIM-Pb(SCN) <sub>3</sub>                        |
| 0           | 4.88x10 <sup>-9</sup><br>±2.52x10 <sup>-10</sup>  | 2.90x10 <sup>-8</sup><br>±2.66x10 <sup>-9</sup>  | 4.68x10 <sup>-8</sup><br>±6.91x10 <sup>-9</sup>  | 1.92x10 <sup>-4</sup><br>±3.05x10 <sup>-5</sup> | 9.09x10 <sup>-4</sup><br>±3.26x10 <sup>-5</sup> | 1.25x10 <sup>-3</sup><br>±5.00x10 <sup>-5</sup> | 7.42x10 <sup>15</sup><br>±5.12x10 <sup>14</sup> | 6.57x10 <sup>15</sup><br>±2.86x10 <sup>14</sup> | 5.47x10 <sup>15</sup><br>±1.98x10 <sup>14</sup>  |
| 24          | 2.44x10 <sup>-9</sup><br>±2.66x10 <sup>-10</sup>  | 8.02x10 <sup>-9</sup><br>±6.91x10 <sup>-10</sup> | 1.70x10 <sup>-9</sup><br>±3.37x10 <sup>-10</sup> | 1.65x10 <sup>-4</sup><br>±9.91x10 <sup>-5</sup> | 4.68x10 <sup>-4</sup><br>±6.49x10 <sup>-5</sup> | 6.37x10 <sup>-4</sup><br>±5.30x10 <sup>-5</sup> | 8.39x10 <sup>15</sup><br>±5.26x10 <sup>14</sup> | 7.94x10 <sup>15</sup><br>±6.27x10 <sup>14</sup> | 6.73.x10 <sup>15</sup><br>±5.09x10 <sup>14</sup> |
| 48          | 1.34x10 <sup>-10</sup><br>±6.31x10 <sup>-11</sup> | 4.74x10 <sup>-9</sup><br>±1.07x10 <sup>-10</sup> | 9.87x10 <sup>-9</sup><br>±1.23x10 <sup>-10</sup> | 1.13x10 <sup>-4</sup><br>±3.47x10 <sup>-5</sup> | 3.67x10 <sup>-4</sup><br>±1.91x10 <sup>-5</sup> | 5.93x10 <sup>-4</sup><br>±6.81x10 <sup>-5</sup> | 9.82x10 <sup>15</sup><br>±5.46x10 <sup>14</sup> | 8.45x10 <sup>15</sup><br>±5.10x10 <sup>14</sup> | 6.82x10 <sup>15</sup><br>±2.81x10 <sup>14</sup>  |
| 72          | 1.46x10 <sup>-9</sup><br>±4.51x10 <sup>-10</sup>  | 1.59x10 <sup>-8</sup><br>±3.27x10 <sup>-9</sup>  | 2.68x10 <sup>-8</sup><br>±5.53x10 <sup>-9</sup>  | 1.34x10 <sup>-4</sup><br>±3.00x10 <sup>-5</sup> | 4.66x10 <sup>-4</sup><br>±2.58x10 <sup>-4</sup> | 8.23x10 <sup>-4</sup><br>±5.08x10 <sup>-4</sup> | 1.58x10 <sup>16</sup><br>±1.05x10 <sup>14</sup> | 8.40x10 <sup>15</sup><br>±5.16x10 <sup>14</sup> | 6.92x10 <sup>15</sup><br>±2.81x10 <sup>14</sup>  |
| 96          | 7.46x10 <sup>-10</sup><br>±2.52x10 <sup>-10</sup> | 3.61x10 <sup>-9</sup><br>±7.91x10 <sup>-10</sup> | 7.19x10 <sup>-9</sup><br>±4.54x10 <sup>-10</sup> | 2.47x10 <sup>-5</sup><br>±1.57x10 <sup>-5</sup> | 4.95x10 <sup>-5</sup><br>±5.35x10 <sup>-5</sup> | 8.58x10 <sup>-5</sup><br>±7.70x10 <sup>-6</sup> | 2.33x10 <sup>16</sup><br>±1.48x10 <sup>14</sup> | 1.65x10 <sup>16</sup><br>±1.65x10 <sup>14</sup> | 1.02x10 <sup>16</sup><br>±1.07x10 <sup>14</sup>  |
| 120         | 2.69x10 <sup>-10</sup><br>±1.59x10 <sup>-10</sup> | 2.74x10 <sup>-9</sup><br>±5.27x10 <sup>-10</sup> | 6.38x10 <sup>-9</sup><br>±2.10x10 <sup>-10</sup> | 1.20x10 <sup>-5</sup><br>±2.14x10 <sup>-5</sup> | 6.43x10 <sup>-5</sup><br>±2.07x10 <sup>-5</sup> | 9.80x10 <sup>-5</sup><br>±6.44x10 <sup>-6</sup> | 2.47x10 <sup>16</sup><br>±1.71x10 <sup>14</sup> | 1.96x10 <sup>16</sup><br>±8.51x10 <sup>14</sup> | 1.25x10 <sup>16</sup><br>±1.09x10 <sup>14</sup>  |

**Table S4.** The summarized electric properties from TPC measurement of the perovskite film with various additives from as-prepared to 120 h. The conductivity was calculated when the free charge carrier density is  $3.47 \times 10^{17}$

| Time (h) | Conductivity<br>( $\sigma/\text{cm}$ )             |                                                    |                                                    | Mobility<br>( $\text{cm}^2/\text{V}\cdot\text{S}$ ) |                                                    |                                                    |
|----------|----------------------------------------------------|----------------------------------------------------|----------------------------------------------------|-----------------------------------------------------|----------------------------------------------------|----------------------------------------------------|
|          | Control                                            | BMIM-SCN                                           | BMIM-Pb(SCN) <sub>3</sub>                          | Control                                             | BMIM-SCN                                           | BMIM-Pb(SCN) <sub>3</sub>                          |
| 0        | $1.28 \times 10^{-2}$<br>$\pm 9.00 \times 10^{-4}$ | $2.30 \times 10^{-2}$<br>$\pm 2.53 \times 10^{-3}$ | $2.52 \times 10^{-2}$<br>$\pm 1.46 \times 10^{-3}$ | $2.50 \times 10^{-1}$<br>$\pm 2.23 \times 10^{-2}$  | $3.97 \times 10^{-1}$<br>$\pm 1.51 \times 10^{-2}$ | $4.36 \times 10^{-1}$<br>$\pm 3.72 \times 10^{-2}$ |
| 24       | $1.11 \times 10^{-2}$<br>$\pm 1.10 \times 10^{-3}$ | $1.55 \times 10^{-2}$<br>$\pm 1.63 \times 10^{-3}$ | $1.85 \times 10^{-2}$<br>$\pm 1.29 \times 10^{-3}$ | $2.02 \times 10^{-1}$<br>$\pm 2.17 \times 10^{-2}$  | $3.12 \times 10^{-1}$<br>$\pm 3.49 \times 10^{-2}$ | $3.73 \times 10^{-1}$<br>$\pm 3.33 \times 10^{-2}$ |
| 48       | $7.76 \times 10^{-3}$<br>$\pm 8.05 \times 10^{-4}$ | $1.21 \times 10^{-2}$<br>$\pm 1.22 \times 10^{-3}$ | $1.67 \times 10^{-2}$<br>$\pm 1.84 \times 10^{-3}$ | $1.26 \times 10^{-2}$<br>$\pm 9.72 \times 10^{-4}$  | $2.43 \times 10^{-2}$<br>$\pm 1.88 \times 10^{-2}$ | $3.14 \times 10^{-1}$<br>$\pm 9.01 \times 10^{-3}$ |
| 72       | $5.68 \times 10^{-3}$<br>$\pm 6.00 \times 10^{-4}$ | $1.28 \times 10^{-2}$<br>$\pm 1.60 \times 10^{-3}$ | $1.35 \times 10^{-2}$<br>$\pm 9.05 \times 10^{-4}$ | $9.44 \times 10^{-2}$<br>$\pm 2.06 \times 10^{-3}$  | $1.74 \times 10^{-2}$<br>$\pm 3.82 \times 10^{-2}$ | $2.43 \times 10^{-1}$<br>$\pm 1.10 \times 10^{-2}$ |
| 96       | $3.16 \times 10^{-3}$<br>$\pm 3.51 \times 10^{-4}$ | $9.23 \times 10^{-3}$<br>$\pm 9.12 \times 10^{-4}$ | $1.01 \times 10^{-2}$<br>$\pm 9.90 \times 10^{-4}$ | $5.54 \times 10^{-2}$<br>$\pm 4.11 \times 10^{-3}$  | $1.27 \times 10^{-1}$<br>$\pm 2.73 \times 10^{-2}$ | $1.92 \times 10^{-1}$<br>$\pm 1.28 \times 10^{-2}$ |
| 120      | $1.81 \times 10^{-3}$<br>$\pm 2.12 \times 10^{-4}$ | $5.83 \times 10^{-3}$<br>$\pm 6.40 \times 10^{-4}$ | $9.09 \times 10^{-3}$<br>$\pm 9.85 \times 10^{-4}$ | $4.44 \times 10^{-2}$<br>$\pm 1.10 \times 10^{-3}$  | $1.06 \times 10^{-1}$<br>$\pm 9.24 \times 10^{-3}$ | $1.83 \times 10^{-1}$<br>$\pm 1.21 \times 10^{-2}$ |
